# Supplementary material
Source: publisher site journal article supplement (https://www.dovepress.com/article/315060)
Supplement: Supplementary file 1 [file get_supplementary_file.php]

Table S1. The information of reference standards in CSS granules.

| **Herbs** | **Quality** | **CAS registry** | **Purity** | **Supplier name** |
| --- | --- | --- | --- | --- |
| *Cyperus rotundus* L. | α-Cyperone | 473-08-5 | >98% | Push Bio-Technology, Chengdu, Sichuan, China |
| *Bupleurum falcatum* L. | Saikosaponin A | 20736-09-8 | >98% | Push Bio-Technology, Chengdu, Sichuan, China |
| Saikosaponin D | 20874-52-6 | >98% | Push Bio-Technology, Chengdu, Sichuan, China |
| *Citrus reticulata* Blanco and *Citrus × aurantium* L. | Nobiletin | 478-01-3 | >98% | Push Bio-Technology, Chengdu, Sichuan, China |
| Tangeretin | 481-53-8 | >98% | Push Bio-Technology, Chengdu, Sichuan, China |
| Naringin | 10236-47-2 | >98% | Push Bio-Technology, Chengdu, Sichuan, China |
| Hesperidin | 520-26-3 | >98% | Push Bio-Technology, Chengdu, Sichuan, China |
| Neohesperidi | 13241-33-3 | >98% | Push Bio-Technology, Chengdu, Sichuan, China |
| [*Paeonia lactiflora* Pall.](http://www.theplantlist.org/tpl1.1/record/kew-2560862) | Paeoniflorin | 23180-57-6 | 96.4% | Nation Institutes for Food and Drug Control of China, Beijing, China |
| *Glycyrrhiza uralensis* Fisch. | Liquiritin | 551-15-5 | 93.1% | Nation Institutes for Food and Drug Control of China, Beijing, China |
| Glycyrrhizic acid ammonium salt | 53956-04-0 | >98% | Push Bio-Technology, Chengdu, Sichuan, China |
| *Ligusticum chuanxiong* Hort. | Ferulic acid | 1135-24-6 | >98% | Push Bio-Technology, Chengdu, Sichuan, China |

Table S2. Main analytical parameters of 12 compounds determined by LC-MS/MS.

| **Component** | **MRM mode** | **Parent ion**  **(*m/z)*** | **Product ion (*m/z*)** | **DP (V)** | **CE (eV)** | **CXP (V)** | **EP (V)** |
| --- | --- | --- | --- | --- | --- | --- | --- |
| Nobiletin | Positive | 403.0 | 373.2 | 90 | 40 | 15 | 10 |
| Tangeretin | 373.1 | 343.3 | 90 | 36 | 15 | 10 |
| α-Cyperone | 219.0 | 201.0 | 81 | 27 | 15 | 10 |
| Buspirone (+IS) | 386.0 | 122.0 | 100 | 40 | 15 | 10 |
| Saikosaponin A | Negative | 779.6 | 617.1 | -162 | -51 | -15 | -10 |
| Saikosaponin D | 779.6 | 617.1 | -162 | -51 | -15 | -10 |
| Paeoniflorin | 525.2 | 449.2 | -60 | -21 | -15 | -10 |
| Liquiritin | 416.9 | 254.8 | -93 | -29 | -15 | -10 |
| Glycyrrhizic acid ammonium salt | 821.6 | 469.3 | -148 | -80 | -15 | -10 |
| Naringin | 579.3 | 271.0 | -145 | -51 | -15 | -10 |
| Hesperidin | 609.1 | 300.7 | -109 | -41 | -15 | -10 |
| Neohesperidi | 609.1 | 300.7 | -109 | -41 | -15 | -10 |
| Ferulic acid | 193.0 | 177.9 | -55 | -19 | -15 | -10 |
| Phenytoin sodium (-IS) | 251.0 | 102.0 | -28 | -54 | -15 | -10 |

Abbreviations: MRM, multiple reactions monitoring; DP, declustering potential; CE, collision energy; CXP, cell exit potential; EP, entrance potential.


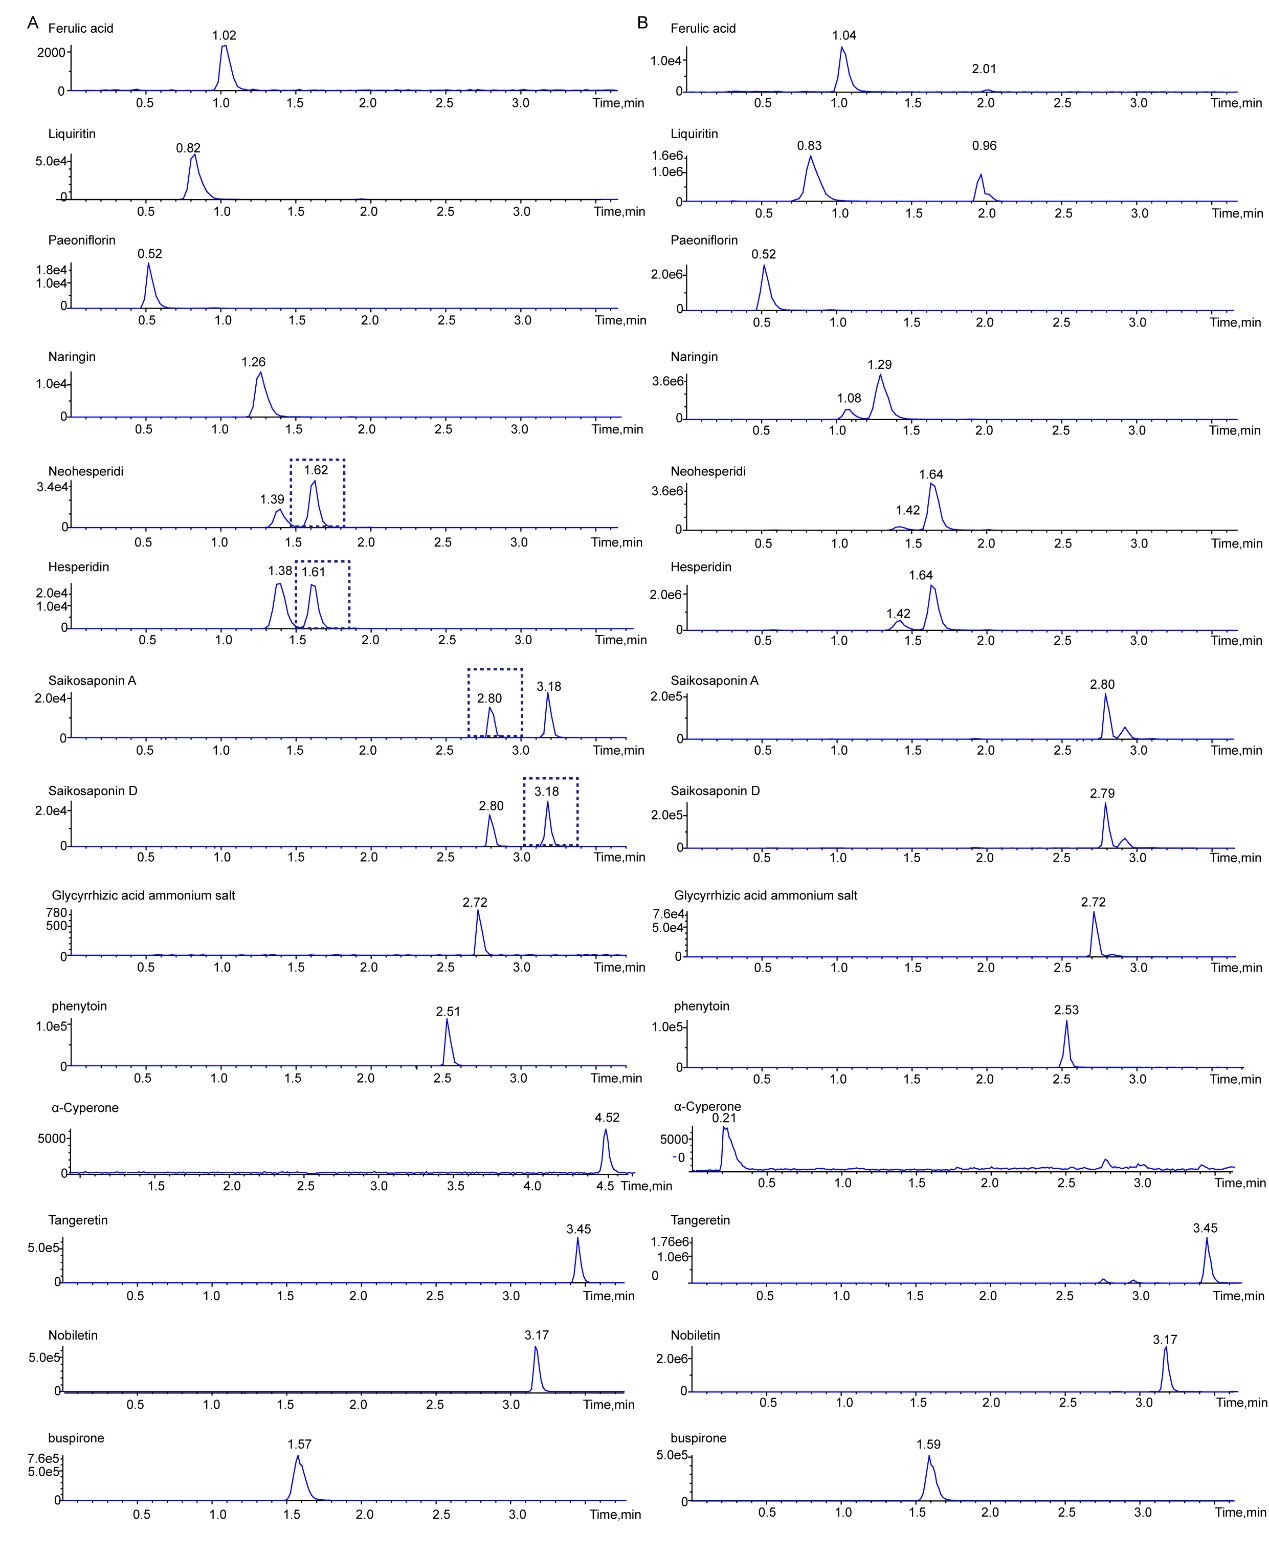


Figure S1. The chromatograms for confirmation of 12 compounds in CSS and internal standard on multiple reaction monitoring (MRM) mode. LC/MS/MS of (A) mixed standards and (B) representative sample with MRM method. From top to bottom: (1) Ferulic acid, (2) Liquiritin, (3) Paeoniflorin (4) Naringin, (5) Neohesperidi, (6) Hesperidin, (7) Saikosaponin A, (8) Saikosaponin D, (9) Glycyrrhizic acid ammonium salt, (10) phenytoin, (11) α-Cyperone, (12) Tangeretin, (13) Nobiletin, (14) buspirone.

Table S3. The determined concentration of 12 components in CSS by LC/MS/MS analysis.

| **Compounds** | **Determined concentration (*μg/g*)** |
| --- | --- |
| Paeoniflorin | 6955 |
| Liquiritin | 1185 |
| Ferulic acid | 277 |
| Naringin | 11850 |
| Hesperidin | 3090 |
| Neohesperidi | 10405 |
| Glycyrrhizic acid ammonium salt | 5036 |
| Saikosaponin A | 310 |
| Nobiletin | 326 |
| Saikosaponin D | 0.0951 |
| Tangeretin | 159 |
| α-Cyperone | 0.903 |

Table S4. The detailed information of the active compounds in CSS.

| **Herbs** | **Mol ID** | **Compounds** | **SMILE** | **MW** | **AlogP** | **Hdon** | **Hacc** | **OB%** |
| --- | --- | --- | --- | --- | --- | --- | --- | --- |
| *Bupleurum falcatum* L. | MOL000354 | isorhamnetin | COC1=C(C=CC(=C1)C2=C(C(=O)C3=C(C=C(C=C3O2)O)O)O)O | 316.28 | 1.76 | 4 | 7 | 49.6 |
| *Bupleurum falcatum* L. | MOL000422 | kaempferol | C1=CC(=CC=C1C2=C(C(=O)C3=C(C=C(C=C3O2)O)O)O)O | 286.25 | 1.77 | 4 | 6 | 41.88 |
| *Bupleurum falcatum* L. | MOL000098 | quercetin | C1=CC(=C(C=C1C2=C(C(=O)C3=C(C=C(C=C3O2)O)O)O)O)O | 302.25 | 1.5 | 5 | 7 | 46.43 |
| *Bupleurum falcatum* L. | MOL000449 | Stigmasterol | CCC(C=CC(C)C1CCC2C1(CCC3C2CC=C4C3(CCC(C4)O)C)C)C(C)C | 412.77 | 7.64 | 1 | 1 | 43.83 |
| *Bupleurum falcatum* L. | MOL004718 | α-spinasterol | CCC(C=CC(C)C1CCC2C1(CCC3C2=CCC4C3(CCC(C4)O)C)C)C(C)C | 412.77 | 7.64 | 1 | 1 | 42.98 |
| *Cyperus rotundus* L. | MOL004071 | Hyndarin | COC1=C(C2=C(CC3C4=CC(=C(C=C4CCN3C2)OC)OC)C=C1)OC | 355.47 | 3.6 | 0 | 5 | 73.94 |
| *Cyperus rotundus* L. | MOL003542 | 8-Isopentenyl-kaempferol | CC(=CCC1=C2C(=C(C=C1O)O)C(=O)C(=C(O2)C3=CC=C(C=C3)O)O)C | 354.38 | 3.63 | 4 | 6 | 38.04 |
| *Cyperus rotundus* L. | MOL000358 | beta-sitosterol | CCC(CCC(C)C1CCC2C1(CCC3C2CC=C4C3(CCC(C4)O)C)C)C(C)C | 414.79 | 8.08 | 1 | 1 | 36.91 |
| *Cyperus rotundus* L. | MOL000006 | luteolin | C1=CC(=C(C=C1C2=CC(=O)C3=C(C=C(C=C3O2)O)O)O)O | 286.25 | 2.07 | 4 | 6 | 36.16 |
| *Cyperus rotundus* L. | MOL003044 | Chryseriol | COC1=C(C=CC(=C1)C2=CC(=O)C3=C(C=C(C=C3O2)O)O)O | 300.28 | 2.32 | 3 | 6 | 35.85 |
| *Ligusticum chuanxiong* Hort. | MOL000433 | FA | C1=CC(=CC=C1C(=O)NC(CCC(=O)O)C(=O)O)NCC2=CN=C3C(=N2)C(=O)N=C(N3)N | 441.45 | 0.01 | 7 | 13 | 68.96 |
| *Ligusticum chuanxiong* Hort. | MOL000359 | sitosterol | CCC(CCC(C)C1CCC2C1(CCC3C2CC=C4C3(CCC(C4)O)C)C)C(C)C | 414.79 | 8.08 | 1 | 1 | 36.91 |
| *Citrus reticulata* Blanco | MOL004328 | naringenin | C1C(OC2=CC(=CC(=C2C1=O)O)O)C3=CC=C(C=C3)O | 272.27 | 2.3 | 3 | 5 | 59.29 |
| *Citrus reticulata* Blanco | MOL005100 | 5,7-dihydroxy-2-(3-hydroxy-4-methoxyphenyl)chroman-4-one | COC1=C(C=C(C=C1)C2CC(=O)C3=C(C=C(C=C3O2)O)O)O | 302.3 | 2.28 | 3 | 6 | 47.74 |
| *Citrus × aurantium* L. | MOL002341 | Hesperetin | COC1=C(C=C(C=C1)C2CC(=O)C3=C(C=C(C=C3O2)O)O)O | 302.3 | 2.28 | 3 | 6 | 70.31 |
| *Citrus × aurantium* L. | MOL005828 | nobiletin | COC1=C(C=C(C=C1)C2=CC(=O)C3=C(O2)C(=C(C(=C3OC)OC)OC)OC)OC | 402.43 | 3.04 | 0 | 8 | 61.67 |
| *Paeonia lactiflora* Pall. | MOL000211 | Mairin | CC(=C)C1CCC2(C1C3CCC4C5(CCC(C(C5CCC4(C3(CC2)C)C)(C)C)O)C)C(=O)O | 456.78 | 6.52 | 2 | 3 | 55.38 |
| *Glycyrrhiza uralensis* Fisch. | MOL004910 | Glabranin | CC(=CCC1=C2C(=C(C=C1O)O)C(=O)CC(O2)C3=CC=CC=C3)C | 324.4 | 4.42 | 2 | 4 | 52.9 |
| *Glycyrrhiza uralensis* Fisch. | MOL003656 | Lupiwighteone | CC(=CCC1=C2C(=C(C=C1O)O)C(=O)C(=CO2)C3=CC=C(C=C3)O)C | 338.38 | 3.92 | 3 | 5 | 51.64 |
| *Glycyrrhiza uralensis* Fisch. | MOL000239 | Jaranol | COC1=CC(=C2C(=C1)OC(=C(C2=O)OC)C3=CC=C(C=C3)O)O | 314.31 | 2.09 | 2 | 6 | 50.83 |
| *Glycyrrhiza uralensis* Fisch. | MOL004961 | Quercetin der. | COC1=C(C=CC(=C1)C2=C(C(=O)C3=C(C=C(C=C3O2)O)O)OC)O | 330.31 | 1.82 | 3 | 7 | 46.45 |
| *Glycyrrhiza uralensis* Fisch. | MOL004811 | Glyasperin C | CC(=CCC1=C(C2=C(C=C1O)OCC(C2)C3=C(C=C(C=C3)O)O)OC)C | 356.45 | 4.73 | 3 | 5 | 45.56 |
| *Glycyrrhiza uralensis* Fisch. | MOL004949 | Isolicoflavonol | CC(=CCC1=C(C=CC(=C1)C2=C(C(=O)C3=C(C=C(C=C3O2)O)O)O)O)C | 354.38 | 3.63 | 4 | 6 | 45.17 |
| *Glycyrrhiza uralensis* Fisch. | MOL004828 | Glepidotin A | CC(=CCC1=C2C(=C(C=C1O)O)C(=O)C(=C(O2)C3=CC=CC=C3)O)C | 338.38 | 3.9 | 3 | 5 | 44.72 |
| *Glycyrrhiza uralensis* Fisch. | MOL004866 | 2-(3,4-dihydroxyphenyl)-5,7-dihydroxy-6-(3-methylbut-2-enyl)chromone | CC(=CCC1=C(C2=C(C=C1O)OC(=CC2=O)C3=CC(=C(C=C3)O)O)O)C | 354.38 | 3.92 | 4 | 6 | 44.15 |
| *Glycyrrhiza uralensis* Fisch. | MOL004815 | (E)-1-(2,4-dihydroxyphenyl)-3-(2,2-dimethylchromen-6-yl)prop-2-en-1-one | CC1(C=CC2=C(O1)C=CC(=C2)C=CC(=O)C3=C(C=C(C=C3)O)O)C | 322.38 | 3.96 | 2 | 4 | 39.62 |
| *Glycyrrhiza uralensis* Fisch. | MOL004945 | (2S)-7-hydroxy-2-(4-hydroxyphenyl)-8-(3-methylbut-2-enyl)chroman-4-one | CC(=CCC1=C(C=CC2=C1OC(CC2=O)C3=CC=C(C=C3)O)O)C | 324.4 | 4.42 | 2 | 4 | 36.57 |
| *Glycyrrhiza uralensis* Fisch. | MOL004935 | Sigmoidin-B | CC(=CCC1=C(C(=CC(=C1)C2CC(=O)C3=C(C=C(C=C3O2)O)O)O)O)C | 356.4 | 3.89 | 4 | 6 | 34.88 |
| *Glycyrrhiza uralensis* Fisch. | MOL001792 | DFV | C1C(OC2=C(C1=O)C=CC(=C2)O)C3=CC=C(C=C3)O | 256.27 | 2.57 | 2 | 4 | 32.76 |
| *Glycyrrhiza uralensis* Fisch. | MOL004988 | Kanzonol F | CC(=CCC1=C(C2=C(C=C1O)OCC3C2OC4=C3C=C5C=CC(OC5=C4)(C)C)OC)C | 420.54 | 5.3 | 1 | 5 | 32.47 |
| *Glycyrrhiza uralensis* Fisch. | MOL004814 | Isotrifoliol | COC1=CC(=CC2=C1C3=C(C4=C(O3)C=C(C=C4)O)C(=O)O2)O | 298.26 | 2.99 | 2 | 6 | 31.94 |
| *Glycyrrhiza uralensis* Fisch. | MOL004891 | shinpterocarpin | CC1(C=CC2=C(O1)C=CC3=C2OCC4C3OC5=C4C=CC(=C5)O)C | 322.38 | 3.46 | 1 | 4 | 80.3 |
| *Glycyrrhiza uralensis* Fisch. | MOL004941 | (2R)-7-hydroxy-2-(4-hydroxyphenyl)chroman-4-one | C1C(OC2=C(C1=O)C=CC(=C2)O)C3=CC=C(C=C3)O | 256.27 | 2.57 | 2 | 4 | 71.12 |
| *Glycyrrhiza uralensis* Fisch. | MOL000392 | formononetin | COC1=CC=C(C=C1)C2=COC3=C(C2=O)C=CC(=C3)O | 268.28 | 2.58 | 1 | 4 | 69.67 |
| *Glycyrrhiza uralensis* Fisch. | MOL004863 | 3-(3,4-dihydroxyphenyl)-5,7-dihydroxy-8-(3-methylbut-2-enyl)chromone | CC(=CCC1=C2C(=C(C=C1O)O)C(=O)C(=CO2)C3=CC(=C(C=C3)O)O)C | 354.38 | 3.65 | 4 | 6 | 66.37 |
| *Glycyrrhiza uralensis* Fisch. | MOL004835 | Glypallichalcone | COC1=CC=C(C=C1)C(=O)C=CC2=C(C=C(C=C2)O)OC | 284.33 | 3.4 | 1 | 4 | 61.6 |
| *Glycyrrhiza uralensis* Fisch. | MOL004824 | (2S)-6-(2,4-dihydroxyphenyl)-2-(2-hydroxypropan-2-yl)-4-methoxy-2,3-dihydrofuro[3,2-g]chromen-7-one | CC(C)(C1CC2=C(O1)C=C3C(=C2OC)C=C(C(=O)O3)C4=C(C=C(C=C4)O)O)O | 384.41 | 2.96 | 3 | 7 | 60.25 |
| *Glycyrrhiza uralensis* Fisch. | MOL005003 | Licoagrocarpin | CC(=CCC1=C(C=CC2=C1OCC3C2OC4=C3C=CC(=C4)OC)O)C | 338.43 | 4.51 | 1 | 4 | 58.81 |

Table S5. The protein targets of CSS.

| **Gene symbol** | **Protein names** | **Uniport** |
| --- | --- | --- |
| ABCC1 | Multidrug resistance-associated protein 1 | P33527 |
| ABCG2 | ATP-binding cassette sub-family G member 2 | Q9UNQ0 |
| ACHE | Acetylcholinesterase | P22303 |
| ADORA1 | Adenosine A1 receptor (by homology) | P30542 |
| ADORA2A | Adenosine A2a receptor (by homology) | P29274 |
| ADORA3 | Adenosine A3 receptor | P0DMS8 |
| AHR | Aryl hydrocarbon receptor | P35869 |
| AKR1A1 | Aldehyde reductase (by homology) | P14550 |
| AKR1B1 | Aldose reductase (by homology) | P15121 |
| AKR1B10 | Aldo-keto reductase family 1 member B10 | O60218 |
| AKR1C1 | Aldo-keto reductase family 1 member C1 (by homology) | Q04828 |
| AKR1C2 | Aldo-keto reductase family 1 member C2 (by homology) | P52895 |
| AKR1C3 | Aldo-keto-reductase family 1 member C3 (by homology) | P42330 |
| AKR1C4 | Aldo-keto reductase family 1 member C4 (by homology) | P17516 |
| AKT1 | Serine/threonine-protein kinase AKT | P31749 |
| AKT3 | RAC-gamma serine/threonine-protein kinase | Q9Y243 |
| ALK | ALK tyrosine kinase receptor | Q9UM73 |
| ALOX12 | Arachidonate 12-lipoxygenase | P18054 |
| ALOX15 | Arachidonate 15-lipoxygenase | P16050 |
| ALOX5 | Arachidonate 5-lipoxygenase | P09917 |
| APBB1 | Amyloid-beta A4 precursor protein-binding family B member 1 | O00213 |
| APEX1 | DNA- (apurinic or apyrimidinic site) lyase | P27695 |
| APP | Beta amyloid A4 protein | P05067 |
| AR | Androgen Receptor | P10275 |
| ARG1 | Arginase-1 (by homology) | P05089 |
| AURKB | Serine/threonine-protein kinase Aurora-B | Q96GD4 |
| AVPR2 | Vasopressin V2 receptor | P30518 |
| AXL | Tyrosine-protein kinase receptor UFO | P30530 |
| BACE1 | Beta-secretase 1 | P56817 |
| CA1 | Carbonic anhydrase I | P00915 |
| CA12 | Carbonic anhydrase XII | O43570 |
| CA13 | Carbonic anhydrase XIII (by homology) | Q8N1Q1 |
| CA14 | Carbonic anhydrase XIV | Q9ULX7 |
| CA2 | Carbonic anhydrase II | P00918 |
| CA3 | Carbonic anhydrase III | P07451 |
| CA4 | Carbonic anhydrase IV | P22748 |
| CA5A | Carbonic anhydrase VA | P35218 |
| CA6 | Carbonic anhydrase VI | P23280 |
| CA7 | Carbonic anhydrase VII | P43166 |
| CA9 | Carbonic anhydrase IX | Q16790 |
| CAMK2B | CaM kinase II beta | Q13554 |
| CBL | Cbl proto-oncogene | P22681 |
| CBR1 | Carbonyl reductase [NADPH] 1 | P16152 |
| CCNB1 | Cyclin-dependent kinase 1/cyclin B | P14635 |
| CCNB2 | Cyclin-dependent kinase 1/cyclin B | O95067 |
| CCNB3 | Cyclin-dependent kinase 1/cyclin B | Q8WWL7 |
| CD38 | Lymphocyte differentiation antigen CD38 | P28907 |
| CDK1 | Cyclin-dependent kinase 1 | P06493 |
| CDK2 | Cyclin-dependent kinase 2 | P24941 |
| CDK5 | CDK5 activator 1 | Q00535 |
| CDK5R1 | Cyclin-dependent kinase 5 | Q15078 |
| CDK6 | Cyclin-dependent kinase 6 | Q00534 |
| CSNK2A1 | Casein kinase II alpha | P68400 |
| CXCR1 | Interleukin-8 receptor A | P25024 |
| CYP17A1 | Cytochrome P450 17A1 | P05093 |
| CYP19A1 | Cytochrome P450 19A1 | P11511 |
| CYP1B1 | Cytochrome P450 1B1 | Q16678 |
| CYP51A1 | Cytochrome P450 51 (by homology) | Q16850 |
| DAPK1 | Death-associated protein kinase 1 | P53355 |
| DRD1 | Dopamine D1 receptor | P21728 |
| DRD2 | Dopamine D2 receptor | P14416 |
| DRD3 | Dopamine D3 receptor | P35462 |
| DRD4 | Dopamine D4 receptor | P21917 |
| EGFR | Epidermal growth factor receptor erbB1 | P00533 |
| ESR1 | Estrogen receptor alpha | P03372 |
| ESR2 | Estrogen receptor beta | Q92731 |
| ESRRA | Estrogen-related receptor alpha | P11474 |
| F2 | Thrombin | P00734 |
| F3 | Coagulation factor VII/tissue factor | P13726 |
| FLT3 | Tyrosine-protein kinase receptor FLT3 | P36888 |
| GLO1 | Glyoxalase I | Q04760 |
| GPR35 | G-protein coupled receptor 35 | Q9HC97 |
| GSK3B | Glycogen synthase kinase-3 beta | P49841 |
| HMGCR | HMG-CoA reductase | P04035 |
| HSD11B1 | 11-beta-hydroxysteroid dehydrogenase 1 | P28845 |
| HSD17B1 | Estradiol 17-beta-dehydrogenase 1 | P14061 |
| HSD17B2 | Estradiol 17-beta-dehydrogenase 2 | P37059 |
| HTR1A | Serotonin 1a (5-HT1a) receptor | P08908 |
| IGF1R | Insulin-like growth factor I receptor | P08069 |
| IL2 | Interleukin-2 | P60568 |
| INSR | Insulin receptor | P06213 |
| KDM4E | Lysine-specific demethylase 4D-like | B2RXH2 |
| KDR | Vascular endothelial growth factor receptor 2 | P35968 |
| MAOA | Monoamine oxidase A | P21397 |
| MAOB | Monoamine oxidase B | P27338 |
| MAPT | Microtubule-associated protein tau | P10636 |
| MET | Hepatocyte growth factor receptor | P08581 |
| MMP12 | Matrix metalloproteinase 12 | P39900 |
| MMP13 | Matrix metalloproteinase 13 | P45452 |
| MMP2 | Matrix metalloproteinase 2 | P08253 |
| MMP3 | Matrix metalloproteinase 3 | P08254 |
| MMP9 | Matrix metalloproteinase 9 | P14780 |
| MPG | DNA-3-methyladenine glycosylase | P29372 |
| MPO | Myeloperoxidase | P05164 |
| MYLK | Myosin light chain kinase, smooth muscle | Q15746 |
| NEK2 | Serine/threonine-protein kinase NEK2 | P51955 |
| NEK6 | Serine/threonine-protein kinase NEK6 | Q9HC98 |
| NOX4 | NADPH oxidase 4 | Q9NPH5 |
| NPC1L1 | Niemann-Pick C1-like protein 1 | Q9UHC9 |
| NUAK1 | NUAK family SNF1-like kinase 1 | O60285 |
| ODC1 | Ornithine decarboxylase | P11926 |
| PARP1 | Poly [ADP-ribose] polymerase-1 | P09874 |
| PDE5A | Phosphodiesterase 5A | O76074 |
| PIK3CG | PI3-kinase p110-gamma subunit | P48736 |
| PIK3R1 | PI3-kinase p85-alpha subunit | P27986 |
| PIM1 | Serine/threonine-protein kinase PIM1 | P11309 |
| PKN1 | Protein kinase N1 | Q16512 |
| PLA2G1B | Phospholipase A2 group 1B | P04054 |
| PLK1 | Serine/threonine-protein kinase PLK1 | P53350 |
| POLB | DNA polymerase beta (by homology) | P06746 |
| PPARG | Peroxisome proliferator-activated receptor gamma | P37231 |
| PTGS1 | Cyclooxygenase-1 | P23219 |
| PTK2 | Focal adhesion kinase 1 | Q05397 |
| PTPN1 | Protein-tyrosine phosphatase 1B | P18031 |
| PTPRS | Receptor-type tyrosine-protein phosphatase S | Q13332 |
| PYGL | Liver glycogen phosphorylase | P06737 |
| RORC | Nuclear receptor ROR-gamma | P51449 |
| SAE1 | SUMO-activating enzyme | Q9UBE0 |
| SHBG | Testis-specific androgen-binding protein | P04278 |
| SLC22A12 | Solute carrier family 22-member 12 | Q96S37 |
| SRC | Tyrosine-protein kinase SRC | P12931 |
| SYK | Tyrosine-protein kinase SYK | P43405 |
| TNKS | Tankyrase-1 | O95271 |
| TNKS2 | Tankyrase-2 | Q9H2K2 |
| TOP1 | DNA topoisomerase I (by homology) | P11387 |
| TOP2A | DNA topoisomerase II alpha | P11388 |
| TTR | Transthyretin | P02766 |
| TYMS | Thymidylate synthase | P04818 |
| TYR | Tyrosinase | P14679 |
| XDH | Xanthine dehydrogenase | P47989 |

Table S6. The prediction targets of MDD.

| **gene symbol** | **Protein names** | **uniport** |
| --- | --- | --- |
| ZHX2 | ZHX2 | Q9Y6X8 |
| WASF2 | WASF2 | Q9Y6W5 |
| PCLO | PCLO | Q9Y6V0 |
| HRH3 | Histamine H3 receptor | Q9Y5N1 |
| SIGLEC7 | SIGLEC7 | Q9Y286 |
| HPSE | HPSE | Q9Y251 |
| CAMK2A | CAMK2A | Q9UQM7 |
| HDAC5 | HDAC5 | Q9UQL6 |
| CTNND2 | CTNND2 | Q9UQB3 |
| WASF3 | WASF3 | Q9UPY6 |
| ABCG2 | ATP-binding cassette sub-family G member 2 | Q9UNQ0 |
| PSMD13 | PSMD13 | Q9UNM6 |
| CDH7 | CDH7 | Q9ULB5 |
| MYT1L | MYT1L | Q9UL68 |
| TBX21 | TBX21 | Q9UL17 |
| KCND3 | Potassium voltage-gated channel subfamily D member 3 | Q9UK17 |
| FOXD3 | FOXD3 | Q9UJU5 |
| AMACR | AMACR | Q9UHK6 |
| IL19 | IL19 | Q9UHD0 |
| CNTNAP2 | CNTNAP2 | Q9UHC6 |
| KL | KL | Q9UEF7 |
| PPP1R1B | PPP1R1B | Q9UD71 |
| GABBR1 | GABBR1 | Q9UBS5 |
| DNMT3B | DNMT3B | Q9UBC3 |
| MBD2 | MBD2 | Q9UBB5 |
| SLC17A6 | SLC17A6 | Q9P2U8 |
| SLC17A7 | SLC17A7 | Q9P2U7 |
| NTM | NTM | Q9P121 |
| GMIP | GMIP | Q9P107 |
| KCND2 | Potassium voltage-gated channel subfamily D member 2 | Q9NZV8 |
| EHD3 | EHD3 | Q9NZN3 |
| GDE1 | GDE1 | Q9NZC3 |
| IL20 | IL20 | Q9NYY1 |
| ELOVL5 | ELOVL5 | Q9NYP7 |
| TLR7 | TLR7 | Q9NYK1 |
| DDIT4 | DDIT4 | Q9NX09 |
| SLC38A7 | SLC38A7 | Q9NVC3 |
| SLC6A13 | SLC6A13 | Q9NSD5 |
| KCNH7 | KCNH7 | Q9NS40 |
| DISC1 | DISC1 | Q9NRI5 |
| PLCB1 | PLCB1 | Q9NQ66 |
| TRPC7 | TRPC7 | Q9HCX4 |
| PDE11A | PDE11A | Q9HCR9 |
| ZBTB20 | ZBTB20 | Q9HC78 |
| prok2 | PROK2 | Q9HC23 |
| LPAR2 | LPAR2 | Q9HBW0 |
| WDR26 | WDR26 | Q9H7D7 |
| BICC1 | BICC1 | Q9H694 |
| RNF41 | RNF41 | Q9H4P4 |
| HRH4 | Histamine H4 receptor | Q9H3N8 |
| SLC6A15 | SLC6A15 | Q9H2J7 |
| KCNH6 | KCNH6 | Q9H252 |
| OR10A4 | OR10A4 | Q9H209 |
| SLC22A4 | Solute carrier family 22 member 4 | Q9H015 |
| LHPP | LHPP | Q9H008 |
| SLC5A7 | SLC5A7 | Q9GZV3 |
| FTO | FTO | Q9C0B1 |
| GNB1L | GNB1L | Q9BYB4 |
| SRRT | SRRT | Q9BXP5 |
| PINK1 | PINK1 | Q9BXM7 |
| C7orf49 | CYREN | Q9BWK5 |
| MTG1 | MTG1 | Q9BT17 |
| GABRG3 | GABA(A) receptor gamma-3 (GABRG3) | Q99928 |
| NPAS2 | NPAS2 | Q99743 |
| SIGMAR1 | SIGMAR1 | Q99720 |
| CHP1 | CHP1 | Q99653 |
| TSNAX | TSNAX | Q99598 |
| P2RX7 | P2RX7 | Q99572 |
| GAD1 | GAD1 | Q99259 |
| PPP1R9B | PPP1R9B | Q96SB3 |
| TAAR1 | Trace amine-associated receptor-1 (TAAR1) | Q96RJ0 |
| TAAR6 | TAAR6 | Q96RI8 |
| QKI | QKI | Q96PU8 |
| LRFN5 | LRFN5 | Q96NI6 |
| DNAH8 | DNAH8 | Q96JB1 |
| PAWR | PAWR | Q96IZ0 |
| SGSM3 | SGSM3 | Q96HU1 |
| PDLIM5 | PDLIM5 | Q96HC4 |
| DTNBP1 | DTNBP1 | Q96EV8 |
| PHF21B | PHF21B | Q96EK2 |
| SIRT1 | SIRT1 | Q96EB6 |
| TESC | TESC | Q96BS2 |
| ISG20 | ISG20 | Q96AZ6 |
| UCN3 | UCN3 | Q969E3 |
| MED12 | MED12 | Q93074 |
| DVL3 | DVL3 | Q92997 |
| IRF7 | IRF7 | Q92985 |
| KHSRP | KHSRP | Q92945 |
| FGF13 | FGF13 | Q92913 |
| NELL1 | NELL1 | Q92832 |
| DLG3 | DLG3 | Q92796 |
| ESR2 | ESR2 | Q92731 |
| NRGN | NRGN | Q92686 |
| EDEM1 | EDEM1 | Q92611 |
| RAPGEF5 | RAPGEF5 | Q92565 |
| DCANP1 | DCANP1 | Q8TF63 |
| HCAR2 | Nicotinic acid receptor (HCAR2) | Q8TDS4 |
| GRIN3A | Glutamate (NMDA) receptor | Q8TCU5 |
| olig1 | OLIG1 | Q8TAK6 |
| MDGA1 | MDGA1 | Q8NFP4 |
| PROKR2 | PROKR2 | Q8NFJ6 |
| ANKK1 | ANKK1 | Q8NFD2 |
| TRPV3 | Transient receptor potential cation channel V3 (TRPV3) | Q8NET8 |
| CMYA5 | CMYA5 | Q8N3K9 |
| IFNL3 | IFNL3 | Q8IZI9 |
| NRSN1 | NRSN1 | Q8IZ57 |
| ZNF34 | ZNF34 | Q8IZ26 |
| NPAS3 | NPAS3 | Q8IXF0 |
| TPH2 | TPH2 | Q8IWU9 |
| HOMER1 | HOMER1 | Q86YM7 |
| PRIMA1 | PRIMA1 | Q86XR5 |
| SLC22A16 | SLC22A16 | Q86VW1 |
| MORC1 | MORC1 | Q86VD1 |
| SLCO6A1 | SLCO6A1 | Q86UG4 |
| mettl3 | METTL3 | Q86U44 |
| ABI3BP | ABI3BP | Q7Z7G0 |
| ZNF804A | ZNF804A | Q7Z570 |
| FAM214B | FAM214B | Q7L5A3 |
| RAPH1 | RAPH1 | Q70E73 |
| TBC1D9 | TBC1D9 | Q6ZT07 |
| KYAT3 | KYAT3 | Q6YP21 |
| SOSTDC1 | SOSTDC1 | Q6X4U4 |
| ATF7IP | ATF7IP | Q6VMQ6 |
| CRTC1 | CRTC1 | Q6UUV9 |
| ALKBH5 | ALKBH5 | Q6P6C2 |
| cc2d1a | CC2D1A | Q6P1N0 |
| MCTP2 | MCTP2 | Q6DN12 |
| GLT8D1 | GLT8D1 | Q68CQ7 |
| ARTN | ARTN | Q5T4W7 |
| EXOSC6 | EXOSC6 | Q5RKV6 |
| KIAA2022 | NEXMIF | Q5QGS0 |
| EARS2 | EARS2 | Q5JPH6 |
| ZNF326 | ZNF326 | Q5BKZ1 |
| SMUG1 | SMUG1 | Q53HV7 |
| CHRFAM7A | CHRFAM7A | Q494W8 |
| PARP15 | PARP15 | Q460N3 |
| PFKFB3 | PFKFB3 | Q16875 |
| KYAT1 | KYAT1 | Q16773 |
| KYNU | KYNU | Q16719 |
| HIF1A | HIF1A | Q16665 |
| MOG | MOG | Q16653 |
| NTRK2 | NTRK2 | Q16620 |
| AANAT | AANAT | Q16613 |
| HLF | HLF | Q16534 |
| CRY1 | CRY1 | Q16526 |
| NTRK3 | NTRK3 | Q16288 |
| GRIK4 | GRIK4 | Q16099 |
| CHRNA2 | Neuronal acetylcholine receptor subunit alpha-2 | Q15822 |
| NPY5R | Neuropeptide Y receptor type 5 (NPY5R) | Q15761 |
| DLG2 | DLG2 | Q15700 |
| TMED2 | TMED2 | Q15363 |
| PTPRR | PTPRR | Q15256 |
| PLCB4 | PLCB4 | Q15147 |
| PEA15 | PEA15 | Q15121 |
| GRIN2C | Glutamate (NMDA) receptor | Q14957 |
| GRM3 | GRM3 | Q14832 |
| GRM7 | GRM7 | Q14831 |
| IKBKE | IKBKE | Q14164 |
| LRP8 | LRP8 | Q14114 |
| CYP2B | CYP2B protein | Q14097 |
| CACNA1C | CACNA1C | Q13936 |
| LAMC2 | LAMC2 | Q13753 |
| HTR4 | HTR4 | Q13639 |
| GPR50 | GPR50 | Q13585 |
| FKBP5 | FKBP5 | Q13451 |
| LSAMP | LSAMP | Q13449 |
| crhr2 | CRHR2 | Q13324 |
| GRIN2B | Glutamate (NMDA) receptor | Q13224 |
| NR1H3 | Oxysterols receptor LXR-alpha (NR1H3) | Q13133 |
| REST | REST | Q13127 |
| IL24 | IL24 | Q13007 |
| GRIK3 | GRIK3 | Q13003 |
| ANK3 | ANK3 | Q12955 |
| GRIN2A | Glutamate (NMDA) receptor | Q12879 |
| KCNH2 | Potassium voltage-gated channel subfamily H member 2 | Q12809 |
| tfcp2 | TFCP2 | Q12800 |
| TEF | TEF | Q10587 |
| KCNA1 | Potassium voltage-gated channel subfamily A member 1 | Q09470 |
| ACSM1 | ACSM1 | Q08AH1 |
| LRP1 | LRP1 | Q07954 |
| PDE4B | PDE4B | Q07343 |
| ENPEP | ENPEP | Q07075 |
| FMR1 | FMR1 | Q06787 |
| SLC18A2 | SLC18A2 | Q05940 |
| ZBTB16 | ZBTB16 | Q05516 |
| GAD2 | GAD2 | Q05329 |
| CREM | CREM | Q03060 |
| POU3F1 | POU3F1 | Q03052 |
| DST | DST | Q03001 |
| FKBP4 | FKBP4 | Q02790 |
| MAP2K1 | MAP2K1 | Q02750 |
| NRG1 | NRG1 | Q02297 |
| SLC6A3 | SLC6A3 | Q01959 |
| REEP5 | REEP5 | Q00765 |
| CDK5 | CDK5 | Q00535 |
| VLDLR | VLDLR | P98155 |
| ADARB1 | ADARB1 | P78563 |
| RELN | RELN | P78509 |
| dlg4 | DLG4 | P78352 |
| VAMP2 | VAMP2 | P63027 |
| RAC1 | RAC1 | P63000 |
| YWHAE | YWHAE | P62258 |
| USP46 | USP46 | P62068 |
| SST | SST | P61278 |
| CKS1B | Cyclin-dependent kinases regulatory subunit 1 | P61024 |
| S100A10 | S100A10 | P60903 |
| SNAP25 | SNAP25 | P60880 |
| IL2 | IL2 | P60568 |
| NANOS3 | NANOS3 | P60323 |
| PLP1 | PLP1 | P60201 |
| DEFA1 | DEFA1B | P59665 |
| DAOA | DAOA | P59103 |
| PER3 | PER3 | P56645 |
| MARS | MARS | P56192 |
| ADAR | ADAR | P55265 |
| UCN | UCN | P55089 |
| EMP1 | EMP1 | P54849 |
| GALC | GALC | P54803 |
| EPHB1 | EPHB1 | P54762 |
| SEC24C | SEC24C | P53992 |
| FOSB | FOSB | P53539 |
| NUP98 | NUP98 | P52948 |
| THOP1 | THOP1 | P52888 |
| ADCY7 | ADCY7 | P51828 |
| PLXNA3 | PLXNA3 | P51805 |
| GPM6A | GPM6A | P51674 |
| MECP2 | MECP2 | P51608 |
| CYP2J2 | Cytochrome P450 2J2 | P51589 |
| HTR6 | 5-hydroxytryptamine receptor 6 | P50406 |
| GSK3B | GSK3B | P49841 |
| NDUFV1 | NDUFV1 | P49821 |
| RGS4 | RGS4 | P49798 |
| STAR | STAR | P49675 |
| ALDH7A1 | ALDH7A1 | P49419 |
| ARRB1 | ARRB1 | P49407 |
| npy2r | NPY2R | P49146 |
| TDO2 | TDO2 | P48775 |
| CSNK1D | CSNK1D | P48730 |
| SLC1A6 | SLC1A6 | P48664 |
| SOX9 | SOX9 | P48436 |
| GRIA4 | GRIA4 | P48058 |
| MTNR1A | Melatonin receptor type 1A (MTNR1A) | P48039 |
| XDH | XDH | P47989 |
| AVPR1B | Vasopressin V1b receptor (V1BR) | P47901 |
| HTR5A | 5-hydroxytryptamine receptor 5A | P47898 |
| GALR1 | GALR1 | P47211 |
| notch1 | NOTCH1 | P46531 |
| HTR3A | HTR3A | P46098 |
| CBX5 | CBX5 | P45973 |
| CHRNA4 | CHRNA4 | P43681 |
| NR4A2 | NR4A2 | P43354 |
| SLC1A1 | SLC1A1 | P43005 |
| SLC1A2 | SLC1A2 | P43004 |
| SLC1A3 | SLC1A3 | P43003 |
| MTHFR | MTHFR | P42898 |
| HTT | HTT | P42858 |
| CDKN2A | CDKN2A | P42771 |
| MTOR | MTOR | P42345 |
| GRIA2 | GRIA2 | P42262 |
| GRIA1 | GRIA1 | P42261 |
| ELK3 | ELK3 | P41970 |
| HTR2B | 5-hydroxytryptamine receptor 2B | P41595 |
| GRM5 | GRM5 | P41594 |
| VIPR2 | VIPR2 | P41587 |
| ADCYAP1R1 | ADCYAP1R1 | P41586 |
| LEP | LEP | P41159 |
| OPRL1 | Nociceptin receptor (OPRL1) | P41146 |
| OPRK1 | Opioid receptor kappa (OPRK1) | P41145 |
| OPRD1 | Opioid receptor delta (OPRD1) | P41143 |
| PEX19 | PEX19 | P40855 |
| il6st | Interleukin 6 receptor (IL7R) | P40189 |
| GDNF | GDNF | P39905 |
| CUX1 | CUX1 | P39880 |
| CHRNA7 | CHRNA7 | P36544 |
| Ugt2b10 | UDP-glucuronosyltransferase 2B10 | P36537 |
| KDR | KDR | P35968 |
| ATP7B | ATP7B | P35670 |
| DRD3 | DRD3 | P35462 |
| OPRM1 | OPRM1 | P35372 |
| ADRA1B | Alpha-1B adrenergic receptor | P35368 |
| HRH1 | Histamine H1 receptor (H1R) | P35367 |
| PTGS2 | PTGS2 | P35354 |
| ADRA1A | ADRA1A | P35348 |
| SSTR5 | SSTR5 | P35346 |
| CRHR1 | CRHR1 | P34998 |
| HTR7 | 5-HT 7 receptor (HTR7) | P34969 |
| GRK5 | GRK5 | P34947 |
| HSPA4 | HSPA4 | P34932 |
| HSPA1L | HSPA1L | P34931 |
| GABRA3 | GABRA3 | P34903 |
| abcc1 | ABCC1 | P33527 |
| cyp2c19 | CYP2C19 | P33261 |
| CYP2C18 | Cytochrome P450 2C18 | P33260 |
| CSF2RB | CSF2RB | P32927 |
| CHRNA3 | Neuronal acetylcholine receptor subunit alpha-3 | P32297 |
| BRS3 | BRS3 | P32247 |
| CCKAR | CCKAR | P32238 |
| SSTR4 | SSTR4 | P31391 |
| FGF9 | FGF9 | P31371 |
| NTSR1 | NTSR1 | P30989 |
| CHRNB4 | Neuronal acetylcholine receptor subunit beta-4 | P30926 |
| GCH1 | GCH1 | P30793 |
| oxtr | OXTR | P30559 |
| BDKRB2 | BDKRB2 | P30411 |
| PDIA3 | PDIA3 | P30101 |
| PEBP1 | PEBP1 | P30086 |
| GCHFR | GCHFR | P30047 |
| OAS2 | OAS2 | P29728 |
| TYK2 | TYK2 | P29597 |
| NOS1 | NOS1 | P29475 |
| NOS3 | NOS3 | P29474 |
| EPHB2 | EPHB2 | P29323 |
| CD34 | CD34 | P28906 |
| DUSP1 | DUSP1 | P28562 |
| MAPK1 | MAPK1 | P28482 |
| HTR2A | HTR2A | P28223 |
| HTR1B | HTR1B | P28222 |
| HTR1D | 5-HT 1D receptor (HTR1D) | P28221 |
| PSMB4 | PSMB4 | P28070 |
| IL1R2 | IL1R2 | P27930 |
| CFP | CFP | P27918 |
| PDE4A | PDE4A | P27815 |
| MAPK3 | MAPK3 | P27361 |
| GIF | GIF | P27352 |
| MAOB | Monoamine oxidase | P27338 |
| PON1 | PON1 | P27169 |
| DNMT1 | DNMT1 | P26358 |
| PTX3 | PTX3 | P26022 |
| F2R | F2R | P25116 |
| ACKR3 | ACKR3 | P25106 |
| TACR1 | Substance-P receptor (TACR1) | P25103 |
| EDNRA | EDNRA | P25101 |
| ADRA1D | Alpha-1D adrenergic receptor | P25100 |
| GRK2 | GRK2 | P25098 |
| HRH2 | Histamine H2 receptor | P25021 |
| ACP1 | ACP1 | P24666 |
| CYP3A7 | Cytochrome P450 3A7 | P24462 |
| CRHBP | CRHBP | P24387 |
| CCND1 | CCND1 | P24385 |
| SLC6A2 | SLC6A2 | P23975 |
| EIF4B | EIF4B | P23588 |
| BDNF | BDNF | P23560 |
| PTGS1 | Prostaglandin G/H synthase 1 | P23219 |
| MMP8 | MMP8 | P22894 |
| CALB2 | CALB2 | P22676 |
| GAL | GAL | P22466 |
| UGT1A4 | UDP-glucuronosyltransferase 1-4 | P22310 |
| ACHE | ACHE | P22303 |
| IL10 | IL10 | P22301 |
| BMP5 | BMP5 | P22003 |
| COMT | COMT | P21964 |
| CD9 | CD9 | P21926 |
| DRD4 | DRD4 | P21917 |
| ERBB3 | ERBB3 | P21860 |
| FGFR2 | FGFR2 | P21802 |
| DRD1 | DRD1 | P21728 |
| SAT1 | SAT1 | P21673 |
| CNR1 | CNR1 | P21554 |
| MAOA | MAOA | P21397 |
| ENDOU | ENDOU | P21128 |
| MAG | MAG | P20916 |
| cyp3a5 | Cytochrome P450 3A5 | P20815 |
| cyp2b6 | Cytochrome P450 2B6 | P20813 |
| IL11 | IL11 | P20809 |
| NTF3 | NTF3 | P20783 |
| DDC | DDC | P20711 |
| M6PR | M6PR | P20645 |
| MSH3 | MSH3 | P20585 |
| PVALB | PVALB | P20472 |
| TRH | TRH | P20396 |
| TAC1 | TAC1 | P20366 |
| TNFRSF1B | TNFRSF1B | P20333 |
| CHRM3 | CHRM3 | P20309 |
| NFKB1 | NFKB1 | P19838 |
| ITIH1 | ITIH1 | P19827 |
| ORM2 | Alpha-1-acid glycoprotein 2 | P19652 |
| NDUFV2 | NDUFV2 | P19404 |
| ADRA2C | ADRA2C | P18825 |
| EGR1 | EGR1 | P18146 |
| ADRA2B | ADRA2B | P18089 |
| BMP7 | BMP7 | P18075 |
| IGFBP2 | IGFBP2 | P18065 |
| XBP1 | XBP1 | P17861 |
| CHRNB2 | Neuronal acetylcholine receptor beta-2 (CHRNB2) | P17787 |
| TPH1 | TPH1 | P17752 |
| TAL1 | TAL1 | P17542 |
| jund | JUND | P17535 |
| GJA1 | GJA1 | P17302 |
| JUNB | JUNB | P17275 |
| STMN1 | STMN1 | P16949 |
| GNB3 | GNB3 | P16520 |
| CTLA4 | CTLA4 | P16410 |
| CREB1 | CREB1 | P16220 |
| VEGFA | VEGFA | P15692 |
| NQO1 | NQO1 | P15559 |
| ARSA | ARSA | P15289 |
| ANPEP | ANPEP | P15144 |
| GLUL | GLUL | P15104 |
| IDO1 | IDO1 | P14902 |
| IL2RB | IL2RB | P14784 |
| DRD2 | DRD2 | P14416 |
| HCLS1 | HCLS1 | P14317 |
| GFAP | GFAP | P14136 |
| ADRB3 | ADRB3 | P13945 |
| NCAM1 | NCAM1 | P13591 |
| CCL2 | CCL2 | P13500 |
| BMP1 | BMP1 | P13497 |
| ACE | ACE | P12821 |
| SLC25A6 | SLC25A6 | P12236 |
| SLC25A4 | SLC25A4 | P12235 |
| FABP2 | FABP2 | P12104 |
| CYP2C9 | CYP2C9 | P11712 |
| CYP2A6 | Cytochrome P450 2A6 | P11509 |
| VDR | VDR | P11473 |
| FGFR1 | FGFR1 | P11362 |
| BCR | BCR | P11274 |
| CHRM1 | Muscarinic acetylcholine receptor M1 | P11229 |
| SLC2A1 | SLC2A1 | P11166 |
| MAP2 | MAP2 | P11137 |
| CYP2D6 | CYP2D6 | P10635 |
| CYP2C8 | Cytochrome P450 2C8 | P10632 |
| BCL2 | BCL2 | P10415 |
| ACR | ACR | P10323 |
| HSPA1B | HSPA1B | P0DMV9 |
| HSPA1A | HSPA1A | P0DMV8 |
| FREM3 | FREM3 | P0C091 |
| CNP | CNP | P09543 |
| DBH | DBH | P09172 |
| FGF2 | FGF2 | P09038 |
| ADRA2A | ADRA2A | P08913 |
| CHRM5 | Muscarinic acetylcholine receptor M5 | P08912 |
| IL6R | Interleukin 6 receptor (IL6R) | P08887 |
| cyp3a4 | Cytochrome P450 3A4 | P08684 |
| ADRB1 | ADRB1 | P08588 |
| MET | MET | P08581 |
| ITGA2B | ITGA2B | P08514 |
| NR3C2 | NR3C2 | P08235 |
| ABCB1 | ABCB1 | P08183 |
| CHRM4 | Muscarinic acetylcholine receptor M4 | P08173 |
| CHRM2 | CHRM2 | P08172 |
| NGFR | NGFR | P08138 |
| HSP90AA1 | HSP90AA1 | P07900 |
| APRT | APRT | P07741 |
| ADRB2 | Beta-2 adrenergic receptor | P07550 |
| GPX1 | GPX1 | P07203 |
| NEFL | NEFL | P07196 |
| TH | TH | P07101 |
| CRH | CRH | P06850 |
| PRKCB | PRKCB | P05771 |
| JUN | JUN | P05412 |
| IL6 | IL6 | P05231 |
| CYP2E1 | Cytochrome P450 2E1 | P05181 |
| Cyp1a2 | CYP1A2 | P05177 |
| MPO | MPO | P05164 |
| SERPINE1 | SERPINE1 | P05121 |
| APP | APP | P05067 |
| CYP1A1 | Cytochrome P450 1A1 | P04798 |
| NTRK1 | High affinity nerve growth factor receptor | P04629 |
| prb1 | PRB1 | P04280 |
| S100B | S100B | P04271 |
| SOD2 | SOD2 | P04179 |
| NR3C1 | NR3C1 | P04150 |
| CSF2 | CSF2 | P04141 |
| RAF1 | RAF1 | P04049 |
| CAT | CAT | P04040 |
| ND4 | ND4 | P03905 |
| ESR1 | ESR1 | P03372 |
| CXCL10 | CXCL10 | P02778 |
| ALB | Serum albumin | P02768 |
| ORM1 | Alpha-1-acid glycoprotein 1 | P02763 |
| CRP | CRP | P02741 |
| APOE | APOE | P02649 |
| IL2RA | IL2RA | P01589 |
| IL1B | IL1B | P01584 |
| IL1A | IL1A | P01583 |
| IFNG | IFNG | P01579 |
| IFNA1 | IFNA1 | P01562 |
| TNF | TNF | P01375 |
| LTA | LTA | P01374 |
| NPY | NPY | P01303 |
| VIP | VIP | P01282 |
| PDYN | PDYN | P01213 |
| POMC | POMC | P01189 |
| AVP | AVP | P01185 |
| OXT | OXT | P01178 |
| NGF | NGF | P01138 |
| EGF | EGF | P01133 |
| FOS | FOS | P01100 |
| serpina1 | Alpha-1-antitrypsin (SERPINA1) | P01009 |
| REn | REN | P00797 |
| PLG | PLG | P00747 |
| HP | HP | P00738 |
| EGFR | EGFR | P00533 |
| SOD1 | SOD1 | P00441 |
| LDHA | LDHA | P00338 |
| TOMM40 | TOMM40 | O96008 |
| FADS2 | FADS2 | O95864 |
| ADCY5 | ADCY5 | O95622 |
| PCNT | PCNT | O95613 |
| ABCB11 | Bile salt export pump | O95342 |
| HTR3B | HTR3B | O95264 |
| KCNH1 | Potassium voltage-gated channel subfamily H member 1 | O95259 |
| KCNK2 | KCNK2 | O95069 |
| TPPP | TPPP | O94811 |
| PDE9A | PDE9A | O76083 |
| WFS1 | WFS1 | O76024 |
| C1QL1 | C1QL1 | O75973 |
| GABBR2 | GABBR2 | O75899 |
| SLC22A3 | Solute carrier family 22 member 3 | O75751 |
| REM1 | REM1 | O75628 |
| PSIP1 | PSIP1 | O75475 |
| MAF | MAF | O75444 |
| DEAF1 | DEAF1 | O75398 |
| GLRA3 | GLRA3 | O75311 |
| SLIT3 | SLIT3 | O75094 |
| GALR3 | GALR3 | O60755 |
| LMX1B | LMX1B | O60663 |
| FADS1 | FADS1 | O60427 |
| GRIN3B | Glutamate (NMDA) receptor | O60391 |
| ADCY3 | ADCY3 | O60266 |
| KALRN | KALRN | O60229 |
| AKAP8 | AKAP8 | O43823 |
| HCRTR2 | Orexin receptor type 2 (HCRTR2) | O43614 |
| HCRT | HCRT | O43612 |
| GALR2 | GALR2 | O43603 |
| KCNQ2 | Potassium voltage-gated channel subfamily KQT member 2 | O43526 |
| KCNQ3 | Potassium voltage-gated channel subfamily KQT member 3 | O43525 |
| TNFSF12 | TNFSF12-TNFSF13 | O43508 |
| PROM1 | PROM1 | O43490 |
| dhh | DHH | O43323 |
| HSPA12A | HSPA12A | O43301 |
| PER1 | PER1 | O15534 |
| GPR42 | GPR42 | O15529 |
| CLOCK | CLOCK | O15516 |
| FOXP2 | FOXP2 | O15409 |
| GRIN2D | Glutamate (NMDA) receptor | O15399 |
| NVL | NVL | O15381 |
| SLC22A2 | Solute carrier family 22 member 2 | O15244 |
| VGF | VGF | O15240 |
| KMO | KMO | O15229 |
| MDM4 | MDM4 | O15151 |
| HAT1 | HAT1 | O14929 |
| KLF11 | KLF11 | O14901 |
| PSMA7 | PSMA7 | O14818 |
| NRP1 | NRP1 | O14786 |
| GABRD | GABA(A) receptor delta (GABRD) | O14764 |
| TERT | TERT | O14746 |
| MAP2K7 | MAP2K7 | O14733 |
| APAF1 | APAF1 | O14727 |
| NCAN | NCAN | O14594 |
| CIT | CIT | O14578 |
| SCD | SCD | O00767 |
| Cxcr6 | CXCR6 | O00574 |
| FAAH | FAAH | O00519 |
| BCL9 | BCL9 | O00512 |
| KPNA3 | KPNA3 | O00505 |
| PGRMC1 | Sigma receptor | O00264 |
| PSMD9 | PSMD9 | O00233 |
| CORT | CORT | O00230 |
| GRM8 | GRM8 | O00222 |
| CCL24 | CCL24 | O00175 |
| SGK1 | SGK1 | O00141 |
| TSPO | TSPO | B1AH88 |
| RBFOX3 | RBFOX3 | A6NFN3 |
| GRM2 | Metabotropic glutamate receptor 2 (mGluR2) | Q14416 |
| NR1H2 | Oxysterols receptor LXR-beta (NR1H2) | P55055 |
| SLC6A4 | Serotonin transporter (SERT) | P31645 |
| HTR1A | 5-HT 1A receptor (HTR1A) | P08908 |
| GRIN1 | Glutamate (NMDA) receptor | Q05586 |
| HTR1E | 5-hydroxytryptamine receptor 1E | P28566 |
| DRD5 | D (2) dopamine receptor | P21918 |

Table S7. The function enrichment analysis of hub targets.

| **Category** | **Term** | **Count** | **%** | **PValue** | **Genes** | **FDR** |
| --- | --- | --- | --- | --- | --- | --- |
| GOTERM_BP_DIRECT | GO:0045944~positive regulation of transcription from RNA polymerase II promoter | 11 | 45.833333 | 2.52E-07 | GSK3B, APP, AKT1, APBB1, PIK3R1, DRD2, ESR1, DRD3, MET, EGFR, IL2 | 1.49E-04 |
| GOTERM_BP_DIRECT | GO:0043066~negative regulation of apoptotic process | 8 | 33.333333 | 1.72E-06 | GSK3B, KDR, AKT1, PIK3R1, CBL, MPO, EGFR, IL2 | 2.55E-04 |
| GOTERM_BP_DIRECT | GO:0007165~signal transduction | 8 | 33.333333 | 6.80E-04 | AKT3, AKT1, APBB1, PIK3R1, ESR1, MET, EGFR, ESR2 | 0.0200936 |
| GOTERM_BP_DIRECT | GO:0006468~protein phosphorylation | 6 | 25 | 3.24E-04 | GSK3B, APP, AKT3, AKT1, PIK3R1, PIK3CG | 0.0136894 |
| GOTERM_BP_DIRECT | GO:0006979~response to oxidative stress | 5 | 20.833333 | 1.40E-05 | APP, AKT1, MPO, EGFR, PTGS1 | 0.0013225 |
| GOTERM_BP_DIRECT | GO:0046777~protein autophosphorylation | 5 | 20.833333 | 8.08E-05 | GSK3B, CDK5, KDR, AKT1, EGFR | 0.0047778 |
| GOTERM_BP_DIRECT | GO:0008283~cell proliferation | 5 | 20.833333 | 0.0014159 | CDK5, HTR1A, AKT1, MET, EGFR | 0.0321851 |
| GOTERM_BP_DIRECT | GO:0007409~axonogenesis | 4 | 16.666667 | 3.14E-04 | GSK3B, APP, APBB1, DRD2 | 0.0136894 |
| GOTERM_BP_DIRECT | GO:0001963~synaptic transmission, dopaminergic | 4 | 16.666667 | 6.36E-07 | CDK5, DRD2, DRD3, DRD4 | 1.59E-04 |
| GOTERM_BP_DIRECT | GO:0048148~behavioral response to cocaine | 4 | 16.666667 | 8.09E-07 | CDK5, DRD2, DRD3, DRD4 | 1.59E-04 |
| GOTERM_BP_DIRECT | GO:0008542~visual learning | 4 | 16.666667 | 3.07E-05 | APP, CDK5, DRD2, DRD3 | 0.0020145 |
| GOTERM_BP_DIRECT | GO:0045471~response to ethanol | 4 | 16.666667 | 3.84E-04 | MAOB, CBL, DRD3, IL2 | 0.0145891 |
| GOTERM_BP_DIRECT | GO:0048015~phosphatidylinositol-mediated signaling | 4 | 16.666667 | 3.95E-04 | AKT1, PIK3R1, EGFR, PIK3CG | 0.0145891 |
| GOTERM_BP_DIRECT | GO:0018105~peptidyl-serine phosphorylation | 4 | 16.666667 | 6.40E-04 | GSK3B, CDK5, AKT3, AKT1 | 0.0198947 |
| GOTERM_BP_DIRECT | GO:0034776~response to histamine | 3 | 12.5 | 5.38E-06 | DRD2, DRD3, DRD4 | 6.36E-04 |
| GOTERM_BP_DIRECT | GO:0099565~chemical synaptic transmission, postsynaptic | 3 | 12.5 | 1.79E-05 | GSK3B, AKT1, DRD2 | 0.0013225 |
| GOTERM_BP_DIRECT | GO:0007195~adenylate cyclase-inhibiting dopamine receptor signaling pathway | 3 | 12.5 | 1.79E-05 | DRD2, DRD3, DRD4 | 0.0013225 |
| GOTERM_BP_DIRECT | GO:0042417~dopamine metabolic process | 3 | 12.5 | 9.80E-05 | DRD2, DRD3, DRD4 | 0.0052634 |
| GOTERM_BP_DIRECT | GO:0050709~negative regulation of protein secretion | 3 | 12.5 | 1.39E-04 | DRD2, DRD3, DRD4 | 0.0068311 |
| GOTERM_BP_DIRECT | GO:0007194~negative regulation of adenylate cyclase activity | 3 | 12.5 | 4.46E-04 | DRD2, DRD3, DRD4 | 0.0155106 |
| GOTERM_BP_DIRECT | GO:0050482~arachidonic acid secretion | 3 | 12.5 | 4.86E-04 | DRD2, DRD3, DRD4 | 0.0159673 |
| GOTERM_BP_DIRECT | GO:1990090~cellular response to nerve growth factor stimulus | 3 | 12.5 | 8.15E-04 | APP, AKT1, CBL | 0.0218823 |
| GOTERM_BP_DIRECT | GO:0001975~response to amphetamine | 3 | 12.5 | 8.15E-04 | DRD2, DRD3, DRD4 | 0.0218823 |
| GOTERM_BP_DIRECT | GO:0051898~negative regulation of protein kinase B signaling | 3 | 12.5 | 0.0011609 | DRD2, DRD3, XDH | 0.0289432 |
| GOTERM_BP_DIRECT | GO:0018107~peptidyl-threonine phosphorylation | 3 | 12.5 | 0.0012243 | GSK3B, CDK5, AKT1 | 0.0289432 |
| GOTERM_BP_DIRECT | GO:0038128~ERBB2 signaling pathway | 3 | 12.5 | 0.0012243 | AKT1, PIK3R1, EGFR | 0.0289432 |
| GOTERM_BP_DIRECT | GO:0045429~positive regulation of nitric oxide biosynthetic process | 3 | 12.5 | 0.0015661 | AKT1, ESR1, EGFR | 0.0342805 |
| GOTERM_BP_DIRECT | GO:0007173~epidermal growth factor receptor signaling pathway | 3 | 12.5 | 0.0026422 | PIK3R1, CBL, EGFR | 0.0557686 |
| GOTERM_BP_DIRECT | GO:0090325~regulation of locomotion involved in locomotory behavior | 2 | 8.3333333 | 0.0027376 | DRD2, DRD3 | 0.0557905 |
| GOTERM_CC_DIRECT | GO:0005886~plasma membrane | 17 | 70.833333 | 2.12E-06 | GSK3B, APP, HTR1A, PIK3R1, CBL, ESR1, EGFR, PIK3CG, CDK5, AKT3, KDR, AKT1, APBB1, DRD2, MET, DRD3, DRD4 | 2.19E-04 |
| GOTERM_CC_DIRECT | GO:0030426~growth cone | 4 | 16.666667 | 4.06E-04 | GSK3B, CDK5, APBB1, CBL | 0.0139234 |
| GOTERM_CC_DIRECT | GO:0045121~membrane raft | 4 | 16.666667 | 0.0021335 | APP, KDR, CBL, EGFR | 0.0439502 |
| GOTERM_CC_DIRECT | GO:0098794~postsynapse | 3 | 12.5 | 3.47E-04 | GSK3B, AKT1, DRD4 | 0.0139234 |
| GOTERM_CC_DIRECT | GO:0030139~endocytic vesicle | 3 | 12.5 | 0.002095 | DRD2, DRD3, EGFR | 0.0439502 |
| GOTERM_MF_DIRECT | GO:0005524~ATP binding | 8 | 33.333333 | 0.0029011 |  |  |
| GOTERM_MF_DIRECT | GO:0004672~protein kinase activity | 7 | 29.166667 | 6.59E-06 | GSK3B, CDK5, AKT3, AKT1, MET, EGFR, PIK3CG | 3.96E-04 |
| GOTERM_MF_DIRECT | GO:0016301~kinase activity | 5 | 20.833333 | 2.90E-04 | GSK3B, CDK5, AKT1, PIK3R1, PIK3CG | 0.0057959 |
| GOTERM_MF_DIRECT | GO:0019899~enzyme binding | 5 | 20.833333 | 9.79E-04 | APP, AKT1, ESR1, EGFR, ESR2 | 0.0146825 |
| GOTERM_MF_DIRECT | GO:0004674~protein serine/threonine kinase activity | 5 | 20.833333 | 0.0015336 | GSK3B, CDK5, AKT3, AKT1, PIK3CG | 0.0184028 |
| GOTERM_MF_DIRECT | GO:0001591~dopamine neurotransmitter receptor activity, coupled via Gi/Go | 3 | 12.5 | 5.32E-06 | DRD2, DRD3, DRD4 | 3.96E-04 |
| GOTERM_MF_DIRECT | GO:0004952~dopamine neurotransmitter receptor activity | 3 | 12.5 | 1.77E-05 | DRD2, DRD3, DRD4 | 7.09E-04 |
| GOTERM_MF_DIRECT | GO:0030235~nitric-oxide synthase regulator activity | 3 | 12.5 | 4.95E-05 | AKT1, ESR1, EGFR | 0.0014842 |
| GOTERM_MF_DIRECT | GO:0035240~dopamine binding | 3 | 12.5 | 7.94E-05 | DRD2, DRD3, DRD4 | 0.0019051 |
| GOTERM_MF_DIRECT | GO:0046875~ephrin receptor binding | 3 | 12.5 | 5.66E-04 | CDK5, CBL, PIK3CG | 0.0096985 |
| GOTERM_MF_DIRECT | GO:0004714~transmembrane receptor protein tyrosine kinase activity | 3 | 12.5 | 0.0012116 | KDR, MET, EGFR | 0.0161553 |
| GOTERM_MF_DIRECT | GO:0038052~RNA polymerase II transcription factor activity, estrogen-activated sequence-specific DNA binding | 2 | 8.3333333 | 0.0027232 | ESR1, ESR2 | 0.0263772 |
| KEGG_PATHWAY | hsa04151: PI3K-Akt signaling pathway | 9 | 37.5 | 9.33E-06 | GSK3B, AKT3, KDR, AKT1, PIK3R1, MET, EGFR, IL2, PIK3CG | 5.21E-05 |
| KEGG_PATHWAY | hsa05205: Proteoglycans in cancer | 9 | 37.5 | 1.50E-07 | AKT3, KDR, AKT1, PIK3R1, CBL, ESR1, MET, EGFR, PIK3CG | 3.34E-06 |
| KEGG_PATHWAY | hsa04728: Dopaminergic synapse | 8 | 33.333333 | 1.25E-07 | GSK3B, MAOB, MAOA, AKT3, AKT1, DRD2, DRD3, DRD4 | 3.34E-06 |
| KEGG_PATHWAY | hsa04510: Focal adhesion | 8 | 33.333333 | 3.18E-06 | GSK3B, AKT3, KDR, AKT1, PIK3R1, MET, EGFR, PIK3CG | 2.37E-05 |
| KEGG_PATHWAY | hsa04015: Rap1 signaling pathway | 8 | 33.333333 | 3.62E-06 | AKT3, KDR, AKT1, PIK3R1, DRD2, MET, EGFR, PIK3CG | 2.42E-05 |
| KEGG_PATHWAY | hsa05200: Pathways in cancer | 8 | 33.333333 | 2.08E-04 | GSK3B, AKT3, AKT1, PIK3R1, CBL, MET, EGFR, PIK3CG | 4.97E-04 |
| KEGG_PATHWAY | hsa04917: Prolactin signaling pathway | 7 | 29.166667 | 8.57E-08 | GSK3B, AKT3, AKT1, PIK3R1, ESR1, ESR2, PIK3CG | 3.34E-06 |
| KEGG_PATHWAY | hsa04012: ErbB signaling pathway | 7 | 29.166667 | 2.92E-07 | GSK3B, AKT3, AKT1, PIK3R1, CBL, EGFR, PIK3CG | 4.89E-06 |
| KEGG_PATHWAY | hsa04915: Estrogen signaling pathway | 7 | 29.166667 | 6.32E-07 | AKT3, AKT1, PIK3R1, ESR1, EGFR, ESR2, PIK3CG | 7.06E-06 |
| KEGG_PATHWAY | hsa04014: Ras signaling pathway | 7 | 29.166667 | 7.43E-05 | AKT3, KDR, AKT1, PIK3R1, MET, EGFR, PIK3CG | 1.96E-04 |
| KEGG_PATHWAY | hsa05213: Endometrial cancer | 6 | 25 | 6.16E-07 | GSK3B, AKT3, AKT1, PIK3R1, EGFR, PIK3CG | 7.06E-06 |
| KEGG_PATHWAY | hsa05230: Central carbon metabolism in cancer | 6 | 25 | 1.76E-06 | AKT3, AKT1, PIK3R1, MET, EGFR, PIK3CG | 1.68E-05 |
| KEGG_PATHWAY | hsa05218: Melanoma | 6 | 25 | 2.96E-06 | AKT3, AKT1, PIK3R1, MET, EGFR, PIK3CG | 2.37E-05 |
| KEGG_PATHWAY | hsa05215: Prostate cancer | 6 | 25 | 8.57E-06 | GSK3B, AKT3, AKT1, PIK3R1, EGFR, PIK3CG | 5.21E-05 |
| KEGG_PATHWAY | hsa04660: T cell receptor signaling pathway | 6 | 25 | 1.61E-05 | GSK3B, AKT3, AKT1, PIK3R1, IL2, PIK3CG | 8.27E-05 |
| KEGG_PATHWAY | hsa04919: Thyroid hormone signaling pathway | 6 | 25 | 3.17E-05 | GSK3B, AKT3, AKT1, PIK3R1, ESR1, PIK3CG | 1.33E-04 |
| KEGG_PATHWAY | hsa05162: Measles | 6 | 25 | 6.37E-05 | GSK3B, AKT3, AKT1, PIK3R1, IL2, PIK3CG | 1.86E-04 |
| KEGG_PATHWAY | hsa05160: Hepatitis C | 6 | 25 | 6.37E-05 | GSK3B, AKT3, AKT1, PIK3R1, EGFR, PIK3CG | 1.86E-04 |
| KEGG_PATHWAY | hsa04910: Insulin signaling pathway | 6 | 25 | 7.60E-05 | GSK3B, AKT3, AKT1, PIK3R1, CBL, PIK3CG | 1.96E-04 |
| KEGG_PATHWAY | hsa04024: cAMP signaling pathway | 6 | 25 | 4.14E-04 | AKT3, HTR1A, AKT1, PIK3R1, DRD2, PIK3CG | 8.16E-04 |
| KEGG_PATHWAY | hsa05166: HTLV-I infection | 6 | 25 | 0.0012852 | GSK3B, AKT3, AKT1, PIK3R1, IL2, PIK3CG | 0.0019136 |
| KEGG_PATHWAY | hsa05223: Non-small cell lung cancer | 5 | 20.833333 | 3.11E-05 | AKT3, AKT1, PIK3R1, EGFR, PIK3CG | 1.33E-04 |
| KEGG_PATHWAY | hsa04923: Regulation of lipolysis in adipocytes | 5 | 20.833333 | 3.11E-05 | AKT3, AKT1, PIK3R1, PIK3CG, PTGS1 | 1.33E-04 |
| KEGG_PATHWAY | hsa04370: VEGF signaling pathway | 5 | 20.833333 | 4.37E-05 | AKT3, KDR, AKT1, PIK3R1, PIK3CG | 1.72E-04 |
| KEGG_PATHWAY | hsa05210: Colorectal cancer | 5 | 20.833333 | 4.66E-05 | GSK3B, AKT3, AKT1, PIK3R1, PIK3CG | 1.73E-04 |
| KEGG_PATHWAY | hsa05212: Pancreatic cancer | 5 | 20.833333 | 5.62E-05 | AKT3, AKT1, PIK3R1, EGFR, PIK3CG | 1.86E-04 |
| KEGG_PATHWAY | hsa05214: Glioma | 5 | 20.833333 | 5.62E-05 | AKT3, AKT1, PIK3R1, EGFR, PIK3CG | 1.86E-04 |
| KEGG_PATHWAY | hsa05211: Renal cell carcinoma | 5 | 20.833333 | 5.97E-05 | AKT3, AKT1, PIK3R1, MET, PIK3CG | 1.86E-04 |
| KEGG_PATHWAY | hsa04662: B cell receptor signaling pathway | 5 | 20.833333 | 7.11E-05 | GSK3B, AKT3, AKT1, PIK3R1, PIK3CG | 1.96E-04 |
| KEGG_PATHWAY | hsa05220: Chronic myeloid leukemia | 5 | 20.833333 | 8.41E-05 | AKT3, AKT1, PIK3R1, CBL, PIK3CG | 2.09E-04 |
| KEGG_PATHWAY | hsa04066: HIF-1 signaling pathway | 5 | 20.833333 | 2.57E-04 | AKT3, AKT1, PIK3R1, EGFR, PIK3CG | 5.95E-04 |
| KEGG_PATHWAY | hsa05231: Choline metabolism in cancer | 5 | 20.833333 | 3.13E-04 | AKT3, AKT1, PIK3R1, EGFR, PIK3CG | 6.99E-04 |
| KEGG_PATHWAY | hsa05142: Chagas disease (American trypanosomiasis) | 5 | 20.833333 | 3.50E-04 | AKT3, AKT1, PIK3R1, IL2, PIK3CG | 7.33E-04 |
| KEGG_PATHWAY | hsa04931: Insulin resistance | 5 | 20.833333 | 4.04E-04 | GSK3B, AKT3, AKT1, PIK3R1, PIK3CG | 8.16E-04 |
| KEGG_PATHWAY | hsa04726: Serotonergic synapse | 5 | 20.833333 | 4.49E-04 | APP, MAOB, MAOA, HTR1A, PTGS1 | 8.59E-04 |
| KEGG_PATHWAY | hsa04722: Neurotrophin signaling pathway | 5 | 20.833333 | 6.03E-04 | GSK3B, AKT3, AKT1, PIK3R1, PIK3CG | 0.0010926 |
| KEGG_PATHWAY | hsa04611: Platelet activation | 5 | 20.833333 | 8.16E-04 | AKT3, AKT1, PIK3R1, PIK3CG, PTGS1 | 0.0014019 |
| KEGG_PATHWAY | hsa04068: FoxO signaling pathway | 5 | 20.833333 | 9.14E-04 | AKT3, AKT1, PIK3R1, EGFR, PIK3CG | 0.0014941 |
| KEGG_PATHWAY | hsa04550: Signaling pathways regulating pluripotency of stem cells | 5 | 20.833333 | 0.0010771 | GSK3B, AKT3, AKT1, PIK3R1, PIK3CG | 0.001692 |
| KEGG_PATHWAY | hsa04630: Jak-STAT signaling pathway | 5 | 20.833333 | 0.0012276 | AKT3, AKT1, PIK3R1, IL2, PIK3CG | 0.0018692 |
| KEGG_PATHWAY | hsa04932: Non-alcoholic fatty liver disease (NAFLD) | 5 | 20.833333 | 0.001427 | GSK3B, AKT3, AKT1, PIK3R1, PIK3CG | 0.0020342 |
| KEGG_PATHWAY | hsa05164: Influenza A | 5 | 20.833333 | 0.0024034 | GSK3B, AKT3, AKT1, PIK3R1, PIK3CG | 0.0032863 |
| KEGG_PATHWAY | hsa04973: Carbohydrate digestion and absorption | 4 | 16.666667 | 3.44E-04 | AKT3, AKT1, PIK3R1, PIK3CG | 7.33E-04 |
| KEGG_PATHWAY | hsa05030: Cocaine addiction | 4 | 16.666667 | 5.44E-04 | MAOB, CDK5, MAOA, DRD2 | 0.0010128 |
| KEGG_PATHWAY | hsa05221: Acute myeloid leukemia | 4 | 16.666667 | 8.06E-04 | AKT3, AKT1, PIK3R1, PIK3CG | 0.0014019 |
| KEGG_PATHWAY | hsa04150: mTOR signaling pathway | 4 | 16.666667 | 8.94E-04 | AKT3, AKT1, PIK3R1, PIK3CG | 0.0014941 |
| KEGG_PATHWAY | hsa04210: Apoptosis | 4 | 16.666667 | 0.0010859 | AKT3, AKT1, PIK3R1, PIK3CG | 0.001692 |
| KEGG_PATHWAY | hsa04664: Fc epsilon RI signaling pathway | 4 | 16.666667 | 0.0014203 | AKT3, AKT1, PIK3R1, PIK3CG | 0.0020342 |
| KEGG_PATHWAY | hsa05100: Bacterial invasion of epithelial cells | 4 | 16.666667 | 0.0021095 | PIK3R1, CBL, MET, PIK3CG | 0.0029445 |
| KEGG_PATHWAY | hsa04666: Fc gamma R-mediated phagocytosis | 4 | 16.666667 | 0.0026078 | AKT3, AKT1, PIK3R1, PIK3CG | 0.0034945 |
| KEGG_PATHWAY | hsa05222: Small cell lung cancer | 4 | 16.666667 | 0.0026974 | AKT3, AKT1, PIK3R1, PIK3CG | 0.0035436 |
| KEGG_PATHWAY | hsa04914: Progesterone-mediated oocyte maturation | 4 | 16.666667 | 0.0028821 | AKT3, AKT1, PIK3R1, PIK3CG | 0.0037135 |
